# Supplementary material
Source: PubMed Central journal article supplement (PMC8097408)
Supplement: AAC.01839-20-s0001.pdf [file AAC.01839-20-s0001.pdf]

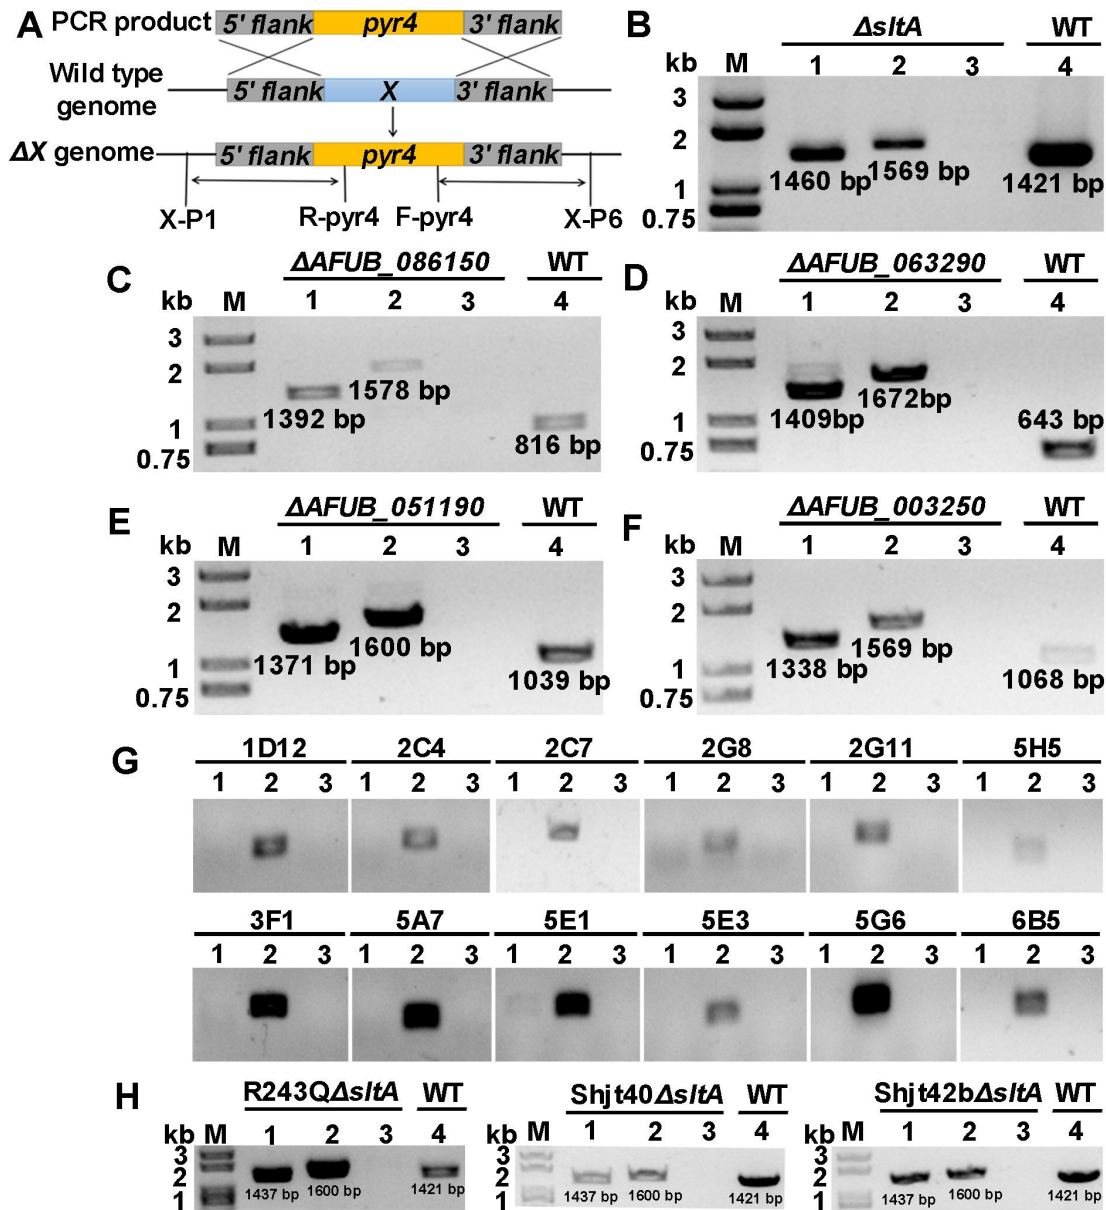

**Supplementary Figure S1 – Diagnostic PCR analyses of indicated deletion mutants.** (A) Schematic view of gene knock-out using homologous recombination strategy. (B to F) The indicated mutations were confirmed by diagnostic PCR. The corresponding mutant genomic DNA was used for PCR with primer pairs x-P1/R-Pyr4 (line 1), x-P6/F-Pyr4 for (line 2), x ORF own primer pair x-S/x-A showing no detectable products, suggesting deletion of x (line 3). In line 4, WT strain showed the predicted size with primer pair x-S/x-A. (G) The indicated mutations from the transcription factors knock-out library were confirmed by diagnostic PCR. Line 1, line 2 and line 3 PCR products were amplified from corresponding mutant genomic DNA, the parental wild-type genomic DNA and double

distilled water, respectively, using corresponding own primer pair. (H) The corresponding mutant genomic DNA was used for PCR with primer pairs *sltA*-P1/R-Hph (line 1), *sltA*-P6/F-Hph for (line 2), *sltA* ORF own primer pair *sltA*-S/*sltA*-A showing no detectable products, suggesting deletion of *sltA* (line 3). In line 4, WT strain showed the predicted size with primer pair *sltA*-S/*sltA*-A.

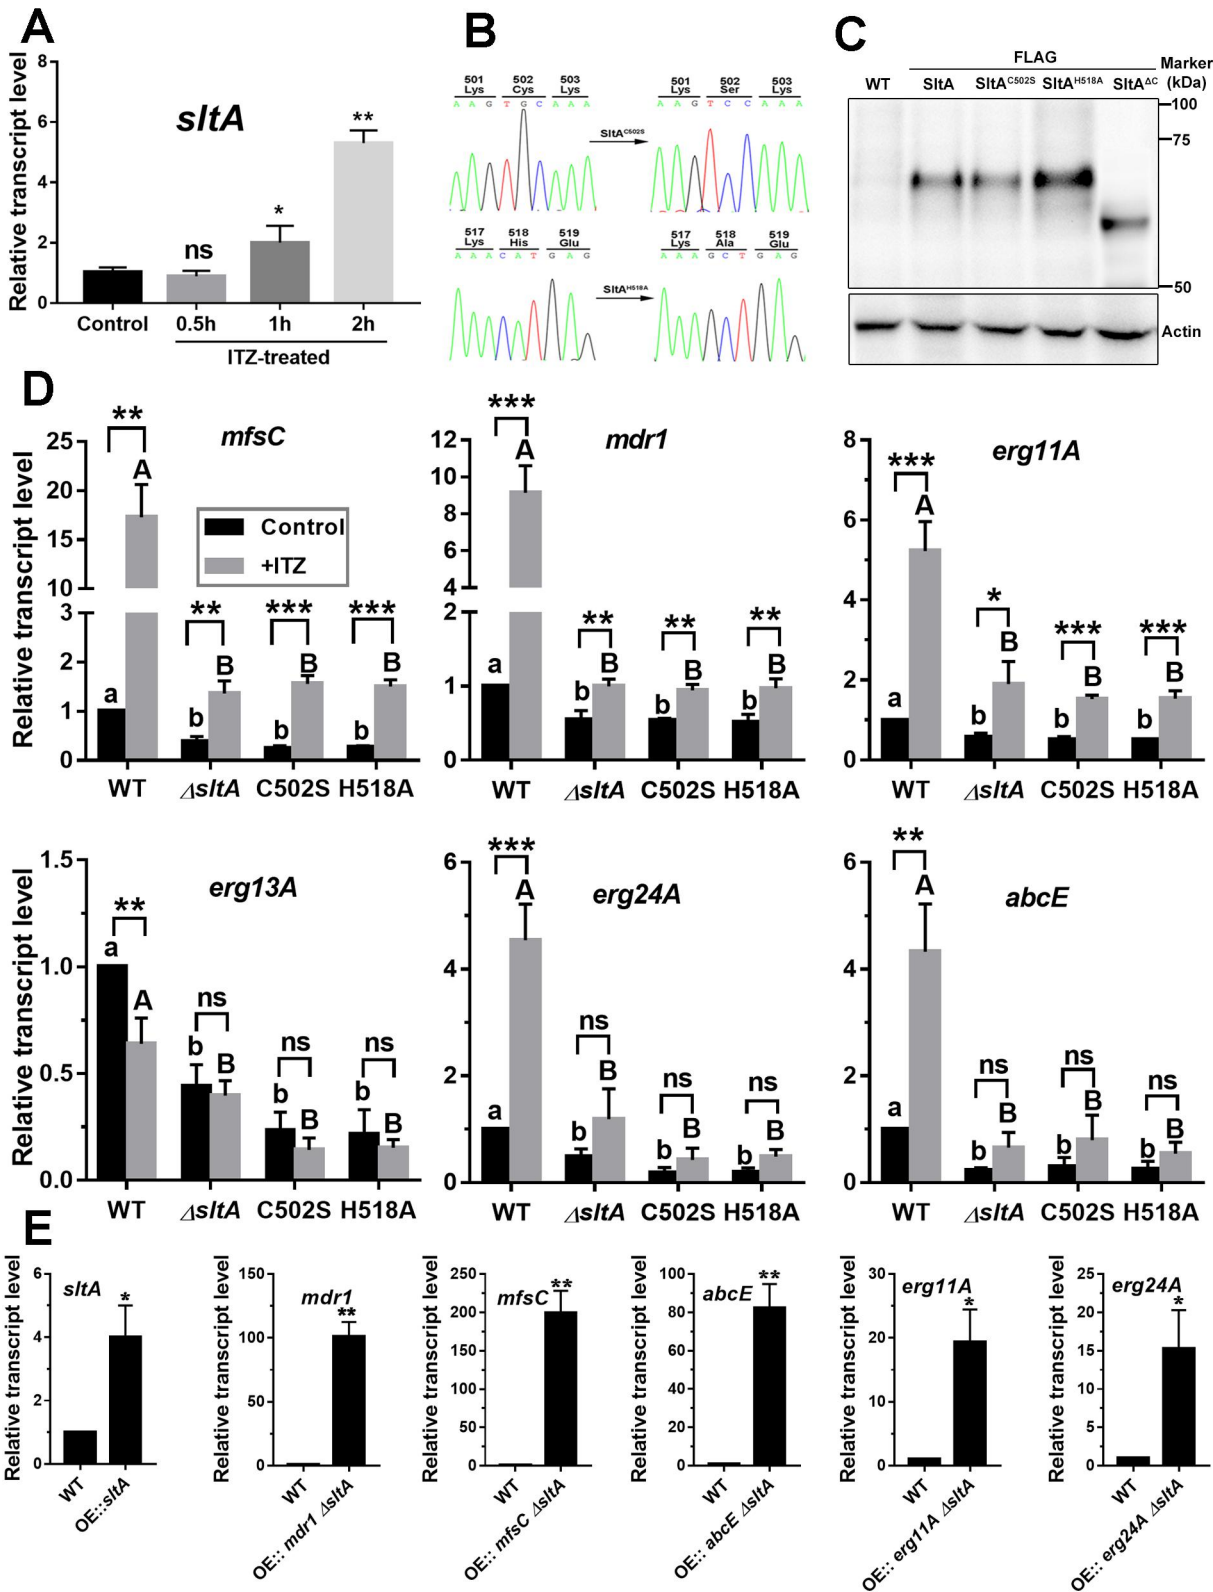

**Supplementary Figure S2 – The analysis of qRT-PCR in the indicated mutants. (A)** qRT-PCR analysis was performed after growth of cultures in MM for 18 h at 37°C and subsequently for 0.5 h, 1 h or 2h of 0.5  $\mu\text{g ml}^{-1}$  itraconazole treatment. The *tubA* gene was used as an internal control. Samples

were assessed in biological triplicates. P-values were calculated using one-way ANOVA: \* $P < 0.05$ ; \*\* $P < 0.01$ ; ns,  $P > 0.05$ . (B) The mutated amino acid was determined by sequence alignment between the parental wild-type and mutant strains. The numbers indicate the position of amino acid. (C) Western blot analysis for the indicated strains cultured in MM at 37°C for 24 h. (D) qRT-PCR analysis was performed after growth of cultures in MM for 18 h at 37°C indicated as control and subsequently 2 h 0.05  $\mu\text{g ml}^{-1}$  itraconazole induction indicated as + ITZ. The *tubA* gene was used as an internal control. P values were calculated using unpaired t-test between treatments: \* $P < 0.05$ ; \*\* $P < 0.01$ ; \*\*\* $P < 0.001$ ; ns,  $P > 0.05$ . Different letters (lowercase for the control; uppercase for the + ITZ) indicated significant differences among treatments ( $P < 0.05$ , Duncan's test). C502S, SitA<sup>C502S</sup>; H518A, SitA<sup>H518A</sup>. (E) qRT-PCR analysis was performed after growth of cultures in MM for 18 h at 37°C. The *tubA* gene was used as an internal control. P-values were calculated using unpaired t-test: \* $P < 0.05$ ; \*\* $P < 0.01$ .

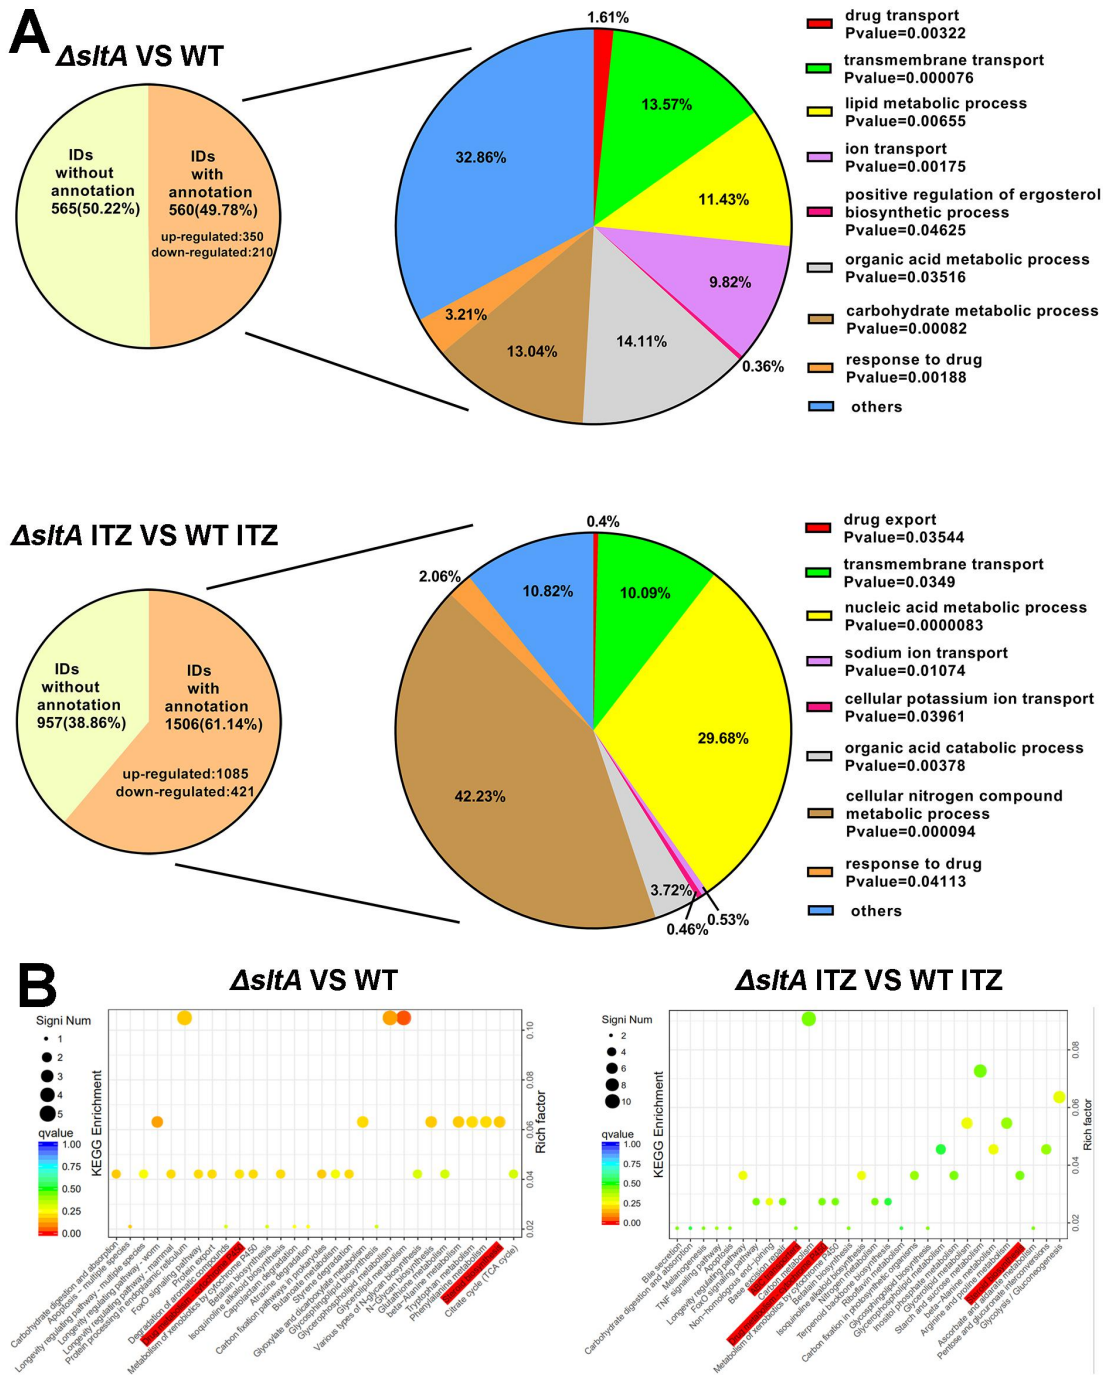

**Supplementary Figure S3 – The analysis of RNA-seq data in *sItA* mutants and the wild-type strain.** (A) The genome-wide genes that were significantly changed in the *ΔsItA* mutant versus its parental wild-type strain with or without itraconazole were categorized using the FungiFun suite. Both the parental wild-type strain and *ΔsItA* grew in liquid MM for 18 h at 37°C and subsequently for 2 h with or without 0.5 μg ml<sup>-1</sup> itraconazole. (B) KEGG analysis of down-regulated genes in *sItA* mutant versus

wild type strain without or with itraconazole treatment. ABC transporters, drug metabolism and steroid biosynthesis which may contribute to *s/tA*-mediated itraconazole resistance were highlighted with red.

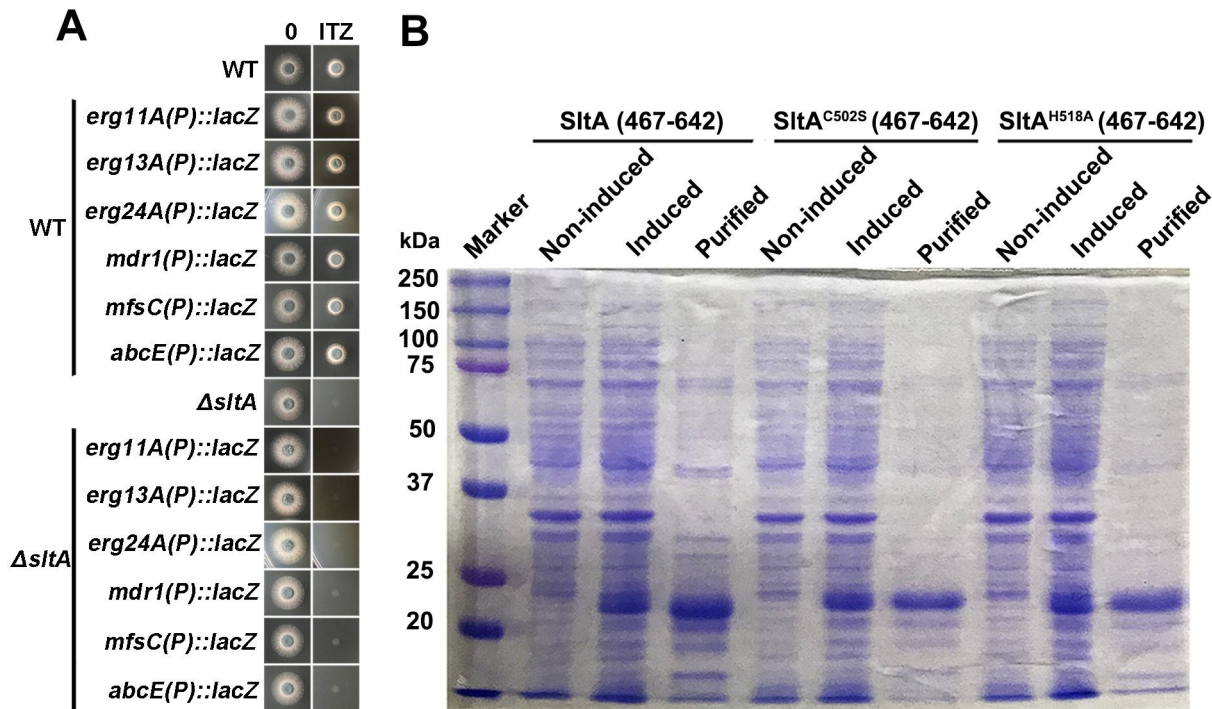

**Supplementary Figure S4 – Colony morphology of the indicated strains and prokaryotic expression of DNA binding domain of *SitA*, *SitA*<sup>C502S</sup> and *SitA*<sup>H518A</sup>.** (A) Colony morphology of the indicated strains grown on YAG medium with or without 0.05  $\mu\text{g ml}^{-1}$  itraconazole at 37°C for 48 h and 36h, respectively. (B) Prokaryotic expression of DNA binding domain of *SitA*, *SitA*<sup>C502S</sup> and *SitA*<sup>H518A</sup>. The protein bands were stained by coomassie brilliant blue.

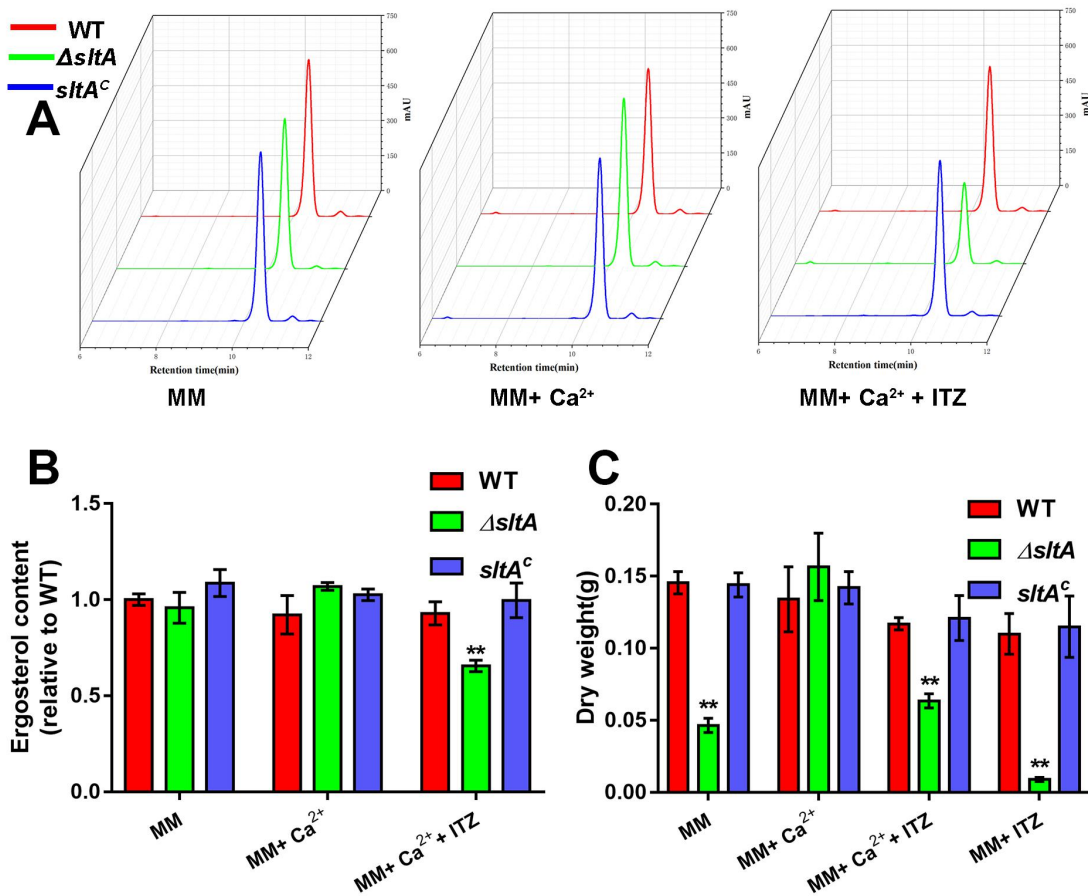

**Supplementary Figure S5 – The measurement of ergosterol contents for *sltA*-related strains. (A)**

The chromatogram showing the ergosterol content of indicated strains. The parental wild-type,  $\Delta sltA$  and  $sltA^C$  strains in MM medium with or without 0.5 mM calcium or 0.5 mM calcium and 0.015  $\mu\text{g ml}^{-1}$  itraconazole incubated for 24 h. (B) Ergosterol content of each mutant was normalized to that of the parental wild-type strain, and shown as a relative fold change. Samples were assessed in biological triplicates. \*\* $P < 0.01$  according to Student's t-test. (C) The indicated strains grown in MM with or without 0.5 mM calcium or 0.5 mM calcium and 0.015  $\mu\text{g ml}^{-1}$  itraconazole for 24 h. We weighed harvested mycelia after dried them. \*\* $P < 0.01$  according to Student's t-test.



**Supplementary Table S1. MEME analysis for the promoters of *mdr1* and *erg11A***

| <i>Aspergillus</i>             | Start | p-value | Sites      |              |            |
|--------------------------------|-------|---------|------------|--------------|------------|
| <b><i>mdr1</i> promoters</b>   |       |         |            |              |            |
| <i>A. japonicus</i>            | -136  | 7.63e-4 | AAAGCTCTTT | <b>AGGCA</b> | CCGATGCTGG |
| <i>A. tubingensis</i>          | -514  | 7.63e-4 | GAAGATTGGA | <b>AGGCA</b> | AAGATGGGGA |
| <i>A. eucalypticola</i>        | -517  | 7.63e-4 | GAAGATTGGA | <b>AGGCA</b> | AAGATGGGGA |
| <i>A. vadensis</i>             | -514  | 7.63e-4 | GAAGATTGGA | <b>AGGCA</b> | AAGATGGGGA |
| <i>A. clavatus</i>             | -136  | 7.63e-4 | CTACTGCATC | <b>AGGCA</b> | TGATCATGAA |
| <i>A. lentulus</i>             | -893  | 7.63e-4 | GTCCACTATT | <b>AGGCA</b> | TGCTAAGCTA |
| <i>A. fischeri</i>             | -692  | 7.63e-4 | GTTGTTCTCT | <b>AGGCA</b> | ACACAGTGCG |
| <i>A. fumigatus</i>            | -670  | 7.63e-4 | CATGTTCTCT | <b>AGGCA</b> | ACACAGTGTG |
| <b><i>erg11A</i> promoters</b> |       |         |            |              |            |
| <i>A. pseudonomius</i>         | -1410 | 8.12e-4 | GAAGTAGAGA | <b>AGGCA</b> | CTCAAACGCA |
| <i>A. oryzae</i>               | -126  | 8.12e-4 | CATCCAGATT | <b>AGGCA</b> | TACACATTGT |
| <i>A. flavus</i>               | -108  | 8.12e-4 | CATCCAGATT | <b>AGGCA</b> | TACACATTGT |
| <i>A. bombycis</i>             | -863  | 8.12e-4 | CTATAGGCAA | <b>AGGCA</b> | TCGTAGTTCA |
| <i>A. terreus</i>              | -445  | 8.12e-4 | ATGGACTTGC | <b>AGGCA</b> | AGATAAGATT |
| <i>A. clavatus</i>             | -1641 | 8.12e-4 | GTAGGTAGGC | <b>AGGCA</b> | AAACCAGAAT |
| <i>A. lentulus</i>             | -985  | 8.12e-4 | TTCAATGCTC | <b>AGGCA</b> | TGGCGGGGGC |
| <i>A. fumigatus</i>            | -958  | 8.12e-4 | TTCAATGCTC | <b>AGGCA</b> | TGGCGGTGCT |

**Supplementary Table S2. *A. fumigatus* strains used in this study**

| Strain                 | Genotype                                                               | Reference or source |
|------------------------|------------------------------------------------------------------------|---------------------|
| A1160                  | <i>Δaku80; pyrG1</i>                                                   | FGSC                |
| WT<br>(A1160C')        | <i>Δaku80; pyrG1; pyrG</i>                                             | (1)                 |
| DWA01                  | <i>Δaku80; pyrG1; ΔsltA::pyr4</i>                                      | This study          |
| DWA02                  | <i>Δaku80; pyrG1; ΔsltA::pyr4; sltA (p)::sltA::hph</i>                 | This study          |
| DWA03                  | <i>Δaku80; pyrG1; ΔsltA::pyr4; AfsltA (p)::AnsltA::hph</i>             | This study          |
| DWA04                  | <i>Δaku80; pyrG1; ΔsltA::pyr4; AfsltA (p)::AfsltA::hph</i>             | This study          |
| DWA05                  | <i>Δaku80; pyrG1; pyrG; gpd (p)::sltA::hph</i>                         | This study          |
| DWA06                  | <i>Δaku80; pyrG1; ΔsltA::pyr4; sltA (p)::sltA<sup>C502S</sup>::hph</i> | This study          |
| DWA07                  | <i>Δaku80; pyrG1; ΔsltA::pyr4; sltA (p)::sltA<sup>H518A</sup>::hph</i> | This study          |
| DWA08                  | <i>Δaku80; pyrG1; ΔsltA::pyr4; sltA (p)::sltA<sup>ΔN</sup>::hph</i>    | This study          |
| DWA09                  | <i>Δaku80; pyrG1; ΔsltA::pyr4; sltA (p)::sltA<sup>ΔC</sup>::hph</i>    | This study          |
| DWA10                  | <i>Δaku80; pyrG1; ΔsltA::pyr4; tet (p)::sltA<sup>ΔN</sup>::hph</i>     | This study          |
| DWA11                  | <i>Δaku80; pyrG1; ΔsltA::pyr4; gpd (p)::mdr1::hph</i>                  | This study          |
| DWA12                  | <i>Δaku80; pyrG1; ΔsltA::pyr4; gpd (p)::mfsC::hph</i>                  | This study          |
| DWA13                  | <i>Δaku80; pyrG1; ΔsltA::pyr4; gpd (p)::abcE::hph</i>                  | This study          |
| DWA14                  | <i>Δaku80; pyrG1; ΔsltA::pyr4; gpd (p)::erg11A::hph</i>                | This study          |
| DWA15                  | <i>Δaku80; pyrG1; ΔsltA::pyr4; gpd (p)::erg24A::hph</i>                | This study          |
| DWA16                  | <i>Δaku80; pyrG1; pyrG; mdr1(p)::lacZ::hph</i>                         | This study          |
| DWA17                  | <i>Δaku80; pyrG1; pyrG; mfsC(p)::lacZ::hph</i>                         | This study          |
| DWA18                  | <i>Δaku80; pyrG1; pyrG; abcE(p)::lacZ::hph</i>                         | This study          |
| DWA19                  | <i>Δaku80; pyrG1; ΔsltA::pyr4; mdr1(p)::lacZ::hph</i>                  | This study          |
| DWA20                  | <i>Δaku80; pyrG1; ΔsltA::pyr4; mfsC(p)::lacZ::hph</i>                  | This study          |
| DWA21                  | <i>Δaku80; pyrG1; ΔsltA::pyr4; abcE(p)::lacZ::hph</i>                  | This study          |
| DWA22                  | <i>Δaku80; pyrG1; pyrG; erg11A(p)::lacZ::hph</i>                       | This study          |
| DWA23                  | <i>Δaku80; pyrG1; pyrG; erg13A(p)::lacZ::hph</i>                       | This study          |
| DWA24                  | <i>Δaku80; pyrG1; pyrG; erg24A(p)::lacZ::hph</i>                       | This study          |
| DWA25                  | <i>Δaku80; pyrG1; ΔsltA::pyr4; erg11A(p)::lacZ::hph</i>                | This study          |
| DWA26                  | <i>Δaku80; pyrG1; ΔsltA::pyr4; erg13A(p)::lacZ::hph</i>                | This study          |
| DWA27                  | <i>Δaku80; pyrG1; ΔsltA::pyr4; erg24A(p)::lacZ::hph</i>                | This study          |
| DWA28                  | <i>Δaku80; pyrG1; pyrG; Erg11A::GFP::hph</i>                           | This study          |
| DWA29                  | <i>Δaku80; pyrG1; ΔsltA::pyr4; Erg11A::GFP::hph</i>                    | This study          |
| DWA30                  | <i>Δaku80; pyrG1; pyrG; Erg11B::GFP::hph</i>                           | This study          |
| DWA31                  | <i>Δaku80; pyrG1; ΔsltA::pyr4; Erg11B::GFP::hph</i>                    | This study          |
| Shjt40                 | TR34/L98H                                                              | (2)                 |
| Shjt42b                | TR34/L98H/S297T/F495I                                                  | (2)                 |
| Cox10 <sup>R243Q</sup> | <i>Δku80; pyrG1; cox10(p)::cox10<sup>R243Q</sup>::pyr4</i>             | (3)                 |
| DWA32                  | Shjt40; <i>ΔsltA::hph</i>                                              | This study          |
| DWA33                  | Shjt42b; <i>ΔsltA::hph</i>                                             | This study          |
| DWA34                  | <i>Δku80; pyrG1; cox10(p)::cox10<sup>R243Q</sup>::pyr4; ΔsltA::hph</i> | This study          |

|       |                                                                    |            |
|-------|--------------------------------------------------------------------|------------|
| DWA35 | <i>Δaku80; pyrG1; ΔAFUB_063290::pyr4</i>                           | This study |
| DWA36 | <i>Δaku80; pyrG1; ΔAFUB_051190::pyr4</i>                           | This study |
| DWA37 | <i>Δaku80; pyrG1; ΔAFUB_003250::pyr4</i>                           | This study |
| DWA38 | <i>Δaku80; pyrG1; ΔAFUB_086150::pyr4</i>                           | This study |
| DWA39 | <i>Δaku80; pyrG1; pyrG; sltA(p)::lacZ::hph</i>                     | This study |
| DWA40 | <i>Δaku80; pyrG1; ΔsltA::pyr4; sltA(p)::lacZ::hph</i>              | This study |
| DWA41 | <i>Δaku80; pyrG1; SlfA::FLAG::pyr4</i>                             | This study |
| DWA42 | <i>Δaku80; pyrG1; ΔsltA::pyr4; SlfA<sup>C502S</sup>::FLAG::hph</i> | This study |
| DWA43 | <i>Δaku80; pyrG1; ΔsltA::pyr4; SlfA<sup>H518A</sup>::FLAG::hph</i> | This study |
| DWA44 | <i>Δaku80; pyrG1; ΔsltA::pyr4; SlfA<sup>ΔC</sup>::FLAG::hph</i>    | This study |

1. Jiang H, Shen Y, Liu W, Lu L. 2014. Deletion of the putative stretch-activated ion channel Mid1 is hypervirulent in *Aspergillus fumigatus*. *Fungal Genet Biol* 62:62-70.
2. Liu MS, Zeng R, Zhang LL, Li DM, Lv GX, Shen YN, Zheng HL, Zhang QQ, Zhao JJ, Zheng N, Liu WD. 2015. Multiple *cyp51A*-Based Mechanisms Identified in Azole-Resistant Isolates of *Aspergillus fumigatus* from China. *Antimicrobial Agents And Chemotherapy* 59:4321-4325.
3. Wei XL, Chen PY, Gao RS, Li YQ, Zhang AX, Liu FF, Lu L. 2017. Screening and Characterization of a Non-*cyp51A* Mutation in an *Aspergillus fumigatus* *cox10* Strain Conferring Azole Resistance. *Antimicrobial Agents And Chemotherapy* 61:e02101-16.

**Supplementary Table S3. Primers used in this study**

| <b>Primer/Purpose</b>                                         | <b>Sequence (5' - 3' direction)</b>      |
|---------------------------------------------------------------|------------------------------------------|
| <b><i>sltA</i> and other TFs deletion and complementation</b> |                                          |
| sltA-P1                                                       | ACCTGAATCAAACGACCCC                      |
| sltA-P2                                                       | TTTCGACCCGTAATACAGCG                     |
| sltA-P3                                                       | ACACCCGCCAACACCCCGGCTGAAAAGGCAAGCACGA    |
| sltA-P4                                                       | CGCCATTCGCCATTCATTTACCGGTCATACTGGA       |
| sltA-P5                                                       | GGAAGAAATCCGTCTGCCTA                     |
| sltA-P6                                                       | AGACCATTCACCTCGCAA                       |
| sltA-P3hph                                                    | CGTCCGTCTCTCCGCATGCGGCTGAAAAGGCAAGCACGA  |
| sltA-P4hph                                                    | GCTCCTCTTCTTTACTCTGATTTACCGGTCATACTGGA   |
| sltA-S                                                        | ATGTCGACCTCTCAGGCTGA                     |
| sltA-A                                                        | CTGAGAGAACGCTTCATCG                      |
| Com-sltA-F                                                    | ACCTGCAGGCATGCAAGCTTCCGTGGTGCCTCCTTGTCTT |
| Com-sltA-R                                                    | CGACGGCCAGTGCCAAGCTTGCGTCTACCAAGGGTCTGA  |
| F-Pyr4                                                        | GCTGCGTTTCCTGACTTGTC                     |
| R-Pyr4                                                        | GGGCGATAATAGATGCTTGG                     |
| Pyr4-F                                                        | GGGTGTTGGCGGGTGT                         |
| Pyr4-R                                                        | TGAATGGCGAATGGCG                         |
| Hph-F                                                         | GCATGCGGAGAGACGGACG                      |
| Hph-R                                                         | TCAGAGTAAAGAAGAGGAGC                     |
| F-Hph                                                         | AGGGCAAAGGAATAGAGT                       |
| R-Hph                                                         | CATTCTCCTTCGCTTACTGC                     |
| 3250-p1                                                       | CCACGCACGACTTGGCTACT                     |
| 3250-p2                                                       | TTTGCTCCCTGCGAAGTAC                      |
| 3250-p3                                                       | ACACCCGCCAACACCCCGGAGGCGGGCTTTGAAGG      |
| 3250-p4                                                       | CGCCATTCGCCATTCAGCCAAGATGACCCCCGTTG      |
| 3250-p5                                                       | GCATTTATGGCGGGTCTGG                      |
| 3250-p6                                                       | GGACTGCGGGAGGGTATTT                      |
| 3250-F                                                        | ATGACCGACGCATACGAAC                      |
| RT-3250-R                                                     | ATCAGTGGGAGTGGGATAGTT                    |
| 1190-P1                                                       | AGCCTCATAGCCATACCCC                      |
| 1190-P2                                                       | CAATGCTTTTACTCCGACCA                     |
| 1190-P3                                                       | ACACCCGCCAACACCCCGCTGCTGATAATGGCCTT      |
| 1190-P4                                                       | CGCCATTCGCCATTCAGTCATATATTCCAACCTAAAG    |
| 1190-P5                                                       | GCAATGCCAATGCACTACG                      |
| 1190-P6                                                       | GGAGCTTCGGCATCATCCA                      |
| 1190-F                                                        | GCATTCACAGACTACAAAGG                     |
| RT-1190-R                                                     | CTGTGAAGGATGTAGCGGAC                     |
| 3290-P1                                                       | TTGTCATCGGGGCTTCTTC                      |
| 3290-P2                                                       | CGAAAAGGAGCAAATCACC                      |
| 3290-P3                                                       | ACACCCGCCAACACCCCTTGTGCAGGAAAAGGAAG      |
| 3290-P4                                                       | CGCCATTCGCCATTCATTGAGCTGTTGTCGTTTATT     |
| 3290-P5                                                       | GCAGAGCCCCACTGAGAATC                     |

3290-P6 GTCGCTTGATTCCCCTTGC  
3290-F ATGCATCGCTCTTTCGAACA  
RT-3290-R GCACTGGGTTTCCATATTCC  
86150-P1 TGGACAACGCAGTGAGTGA  
86150-P2 GCTGGAGGGGCAATAACAC  
86150-P3 ACACCCGCCAACACCCTGTGTGAACGCTTCTTCAG  
86150-P4 CGCCATTCGCCATTATGCAATCCTGCAGCCCC  
86150-P5 TACCGATGTCCCGATTCTC  
86150-P6 TCAGGGATCTTCGATGCTAA  
86150-F ATGGACGTCAATCGTAAGC  
RT-86150-R CTCAGATGCGACGGTGCTT

***sltA* mutation and homolog complementation experiments**

Com-*sltA*-F ACCTGCAGGCATGCAAGCTTCCGTGGTGCCTCCTTGTCTT  
Com-*sltA*-R CGACGGCCAGTGCCAAGCTTGCCTTACCAAGGGTCTGA  
C502S-F GATATTAACCAGAAGTCCAAAGACTGCGACAAG  
C502S-R CTTGTGCGAGTCTTTGGACTTCTGGTTAATATC  
H518A-F GACCGGTTCTAGGAAAGCTGAGAAGACGCACTCTC  
H518A-R GAGAGTGCGTCTTCTCAGCTTTCCTAGAACCGGTC  
*sltA*-P3free GGCTGAAAAGGCAAGCACGA  
 $\Delta$ N-F TCGTGCTTGCCTTTTCAGCCATGGCTCGCCGCAAGAAGAA  
 $\Delta$ C-R TCCAGTATGACCGGTGAAAGCCATTATGTTTTGAGCG  
*sltA*-P4free TTTACCGGTCATACTGGA  
Tet-F HindIII ACCTGCAGGCATGCAAGCTTGTTC AAGTTGCAATGACT  
Tet-R GGTGATGTCTGCTCAAGCGG  
Tet- $\Delta$ N*sltA*F CCGCTTGAGCAGACATCACCATGGCTCGCCGCAAGAAGAA  
ComAn*sltA*-F TCGTGCTTGCCTTTTCAGCCATGAGTCCAGCACAAAGACTC  
ComAn*sltA*-R TCCAGTATGACCGGTGAAATTAGAGACCACCAGGGCC  
ComAf*sltA*-F TCGTGCTTGCCTTTTCAGCCATGTCTTCCGCTCAGCCTG  
ComAf*sltA*-R TCCAGTATGACCGGTGAAATTACATGGAAGATTGGTCCG

**Over-expression**

OE::*sltA*-F CTTTAATCAAGCTTATCGATATGTCGACCTCTCAGGCTGA  
OE::*sltA*-R TCGAGGTGACGGTATCGATTTAGAAATGTTCCATCTCCATA  
OE::*mdr1*-F CTTTAATCAAGCTTATCGATATGCCTGCGCCTGAAACC  
OE::*mdr1*-R TCGAGGTGACGGTATCGATTC AATGAGTCTTCCGAGAC  
OE::*mfsC*-F CTTTAATCAAGCTTATCGATATGACGTCCAACAAAAAATC  
OE::*mfsC*-R TCGAGGTGACGGTATCGATTCACAGCCTTGTGTCTGCGA  
OE::*abcE*-F CTTTAATCAAGCTTATCGATATGGCCCTGCAGCAAGTG  
OE::*abcE*-R TCGAGGTGACGGTATCGATTTATGTCAAAAATCGAGGG  
OE::*erg11A*-F CTTTAATCAAGCTTATCGATATGGTGCCGATGCTATGGC  
OE::*erg11A*-R TCGAGGTGACGGTATCGATTC ACTTGGATGTGTTTTTCG  
OE::*erg24A*-F CTTTAATCAAGCTTATCGATATGGCACCAAGAAAGGAT  
OE::*erg24A*-R TCGAGGTGACGGTATCGATCTAGTAAATACCAGGAATAATG

**$\beta$ -galactosidase activity experiments**

LacZ-S ATGACCATGATTACGGATTC  
LacZ-TrpC-A CGACGGCCAGTGCCAAGCTTTCAGAGTAAAGAAGAGGAGC  
P*mdr1*-F ACCTGCAGGCATGCAAGCTTCTATACTAGCCTATACC

|                |                                           |
|----------------|-------------------------------------------|
| Pmdr1-R-lacZ   | GAATCCGTAATCATGGTCATGTTGCGGTTGAGGGTATGC   |
| PmfsC-F        | ACCTGCAGGCATGCAAGCTTGAGCTTTTTCCCTGAGCTC   |
| PmfsC-R-lacZ   | GAATCCGTAATCATGGTCATCCTAGCCACCTCCTGAACAG  |
| PabcE-F        | ACCTGCAGGCATGCAAGCTTCAACGAGACACATCTAGGG   |
| PabcE-R-lacZ   | GAATCCGTAATCATGGTCATCTTCAGATCTACCCATTTTG  |
| Perg11A-F      | ACCTGCAGGCATGCAAGCTTGACCGAGAGGGCGATTTCCGG |
| Perg11A-R-lacZ | GAATCCGTAATCATGGTCATTTTCGAGGAGACACAGGGAGG |
| Perg13A-F      | ACCTGCAGGCATGCAAGCTTGGATTTGAGCGATTGAATG   |
| Perg13A-R-lacZ | GAATCCGTAATCATGGTCATGGTTGGTCGAAAGAATGCCA  |
| Perg24A-F      | ACCTGCAGGCATGCAAGCTTCGGTGTATCTGCCTGAAGG   |
| Perg24A-R-lacZ | GAATCCGTAATCATGGTCATGTTCCGCCGAGATCGGGTG   |
| PsltA-F        | ACCTGCAGGCATGCAAGCTTCCGTGGTGCCTCCTTGTCTT  |
| PsltA-R-lacZ   | GAATCCGTAATCATGGTCATGGCTGAAAAGGCAAGCACGA  |

### Construction of FLAG labeled strains

|               |                                             |
|---------------|---------------------------------------------|
| SltA-FLAG-P1  | GGCTCGCCGCAAGAAGAAT                         |
| SltA-FLAG-P2  | GAATCTGCTTTGCTCCGTAA                        |
| SltA-FLAG-P3  | CATTCCCGGGGATCCCTCGAGGAAATGTTCCATCTCCATATCC |
| SltA-FLAG-P4  | CGCCATTCGCCATTACATAATTTACCCGGTCATACTG       |
| SltA-FLAG-P5  | GGAAGAAATCCGTCTGCCTA                        |
| SltA-FLAG-P6  | AGACCATTACCTCGCAA                           |
| FLAG-F        | CTCGAGGGATCCCCGGGAATG                       |
| Pyr4-R        | TGAATGGCGAATGGCG                            |
| Com-sltA-F    | ACCTGCAGGCATGCAAGCTTCCGTGGTGCCTCCTTGTCTT    |
| C502S-R       | CTTGTGCGCAGTCTTTGGACTTCTGGTTAATATC          |
| C502S-F       | GATATTAACCAGAAGTCCAAAGACTGCGACAAG           |
| FLAG-R-PAN7-1 | CGACGGCCAGTGCCAAGCTTGACATTCTTTTACCCGGGCT    |
| H518A-F       | GACCGGTTCTAGGAAAGCTGAGAAGACGCACTCTC         |
| H518A-R       | GAGAGTGCGTCTTCTCAGCTTTCCTAGAACCGGTC         |
| ΔC-R-FLAG     | CATTCCCGGGGATCCCTCGAGGCCATTATGTTTTGAGCG     |
| Hph-R         | TCAGAGTAAAGAAGAGGAGC                        |

### EMSA

|                 |                                          |
|-----------------|------------------------------------------|
| EX-sltA-P1NdeI  | AAGAAGGAGATATACATATGCCTGCGATGAAGCGTTCTCT |
| EX-sltA-P2      | GTGAGATCACAAAGGTCTTT                     |
| EX-sltA-P3      | AAAGACCTTGTGATCTCACGAAACATGAGAAGACGCAC   |
| EX-sltA-P4EcoRI | GTCGACGGAGCTCGAATTCGTAGGCAGTGACGGGTTCCG  |
| C502S-F         | GATATTAACCAGAAGTCCAAAGACTGCGACAAG        |
| C502S-R         | CTTGTGCGCAGTCTTTGGACTTCTGGTTAATATC       |
| H518A-F         | GACCGGTTCTAGGAAAGCTGAGAAGACGCACTCTC      |
| H518A-R         | GAGAGTGCGTCTTCTCAGCTTTCCTAGAACCGGTC      |
| Cy5             | AGCACGTGGTCAAAG                          |
| EMSA-erg11A-F   | AGCACGTGGTCAAAGGGGTGTCAAAGCAGTGTTG       |
| EMSA-erg11A-R   | AGCACGTGGTCAAAGGCATCCAGAGAAATTCATAC      |
| EMSA-erg24A-F   | AGCACGTGGTCAAAGCCTGGAGGGCAAGATGTTGA      |
| EMSA-erg24A-R   | AGCACGTGGTCAAAGGTAGTAATACTAATCACCGG      |
| EMSA-mdr1-F     | AGCACGTGGTCAAAGCGCCTTTATTTCAGCAAATC      |
| EMSA-mdr1-R     | AGCACGTGGTCAAAGGTTAAGTTAATGGGGACCAC      |

|                 |                                           |
|-----------------|-------------------------------------------|
| EMSA-mfsC-F     | AGCACGTGGTCGAAAAGTGCAAGGAGTAGAGATCAG      |
| EMSA-mfsC-R     | AGCACGTGGTCGAAAAGCATCTGACGGGGACTAGG       |
| EMSA-abcE-F     | AGCACGTGGTCGAAAAGAGACGTAGTCAGAATCACA      |
| EMSA-abcE-R     | AGCACGTGGTCGAAAAGTGAAGTCCGGGCACCTGA       |
| EMSA-sltB-F     | AGCACGTGGTCGAAAAGCCTGCCACGTGATCTGCCA      |
| EMSA-sltB-R     | AGCACGTGGTCGAAAAGGATGATCTGAAAAGACCAC      |
| EMSA-sltA-F     | AGCACGTGGTCGAAAAGATCCAACCAGCGCTCTGAT      |
| EMSA-sltA-R     | AGCACGTGGTCGAAAAGGGGAAGACGATAGCCTATG      |
| EMSA-erg13A-F   | AGCACGTGGTCGAAAAGCGGTCATATAGCGCAAATC      |
| EMSA-erg13A-R   | AGCACGTGGTCGAAAAGCATGATGACCATATGAATC      |
| EMSA-MUerg11A-F | CACCACTTCTTCAATGCTCCAAACTGGCGGTGCTCGGG    |
| EMSA-MUerg11A-R | CCCGAGCACCGCCAGTTTGGAGCATTGAAGAAGTGGTG    |
| EMSA-MUmdr1-F   | CGAACTTAACATGTTCTCTCAAACACACAGTGTGGCGTAC  |
| EMSA-MUmdr1-R   | GTACGCCACACTGTGTGTTTGAGAGAACATGTTAAGTTCCG |
| EMSA-MUsltB-F   | CGCCACTCCCTATTGGTTCAAACACAGGATTCCTGCCACC  |
| EMSA-MUsltB-R   | GGTGGGCAGGAATCCTGTGTTTGAACCAATAGGGAGTGGCG |

#### **qRT-PCR**

|             |                       |
|-------------|-----------------------|
| RT-tub-F    | TTCCGTCCCGACAACCTTCGT |
| RT-tub-R    | TCACAGCCTTCAGCCTCACG  |
| RT-sltA-F   | AGGCTCAGGGCATTACAACA  |
| RT-sltA-R   | AGTAAAAGAGGGGAAGTCGC  |
| RT-mdr1-F   | ATCTTCCGCTTCTTCGTCTG  |
| RT-mdr1-R   | AATGGTTGGCTTGCTGTCCG  |
| RT-mfsC-F   | GGTACTTGAACGCCTTTTG   |
| RT-mfsC-R   | CGCAGTTGCATCTTTGCTC   |
| RT-abcE-F   | GCCACCGATCCAAAGCAGGT  |
| RT-abcE-R   | TGTGCATGGTAAGGCGGCAA  |
| RT-erg11A-F | CCTATCTTCCGTTTGGTGC   |
| RT-erg11A-R | TTTCAGGGACTCCTTTCTTTC |
| RT-erg24A-F | ATTATGGACGGATTCCGTTAC |
| RT-erg24A-R | CAGAAGGATTTCCCTCAAGC  |
| RT-erg13A-F | CGACGAACTGCGGCAACAT   |
| RT-erg13A-R | ATCCCGATGCGCTTGTCTC   |
| RT-abcB-F   | GCAGCATCAGACGCAACAT   |
| RT-abcB-R   | CGGTGTCTAGTCCGCCTTTC  |
| RT-erg2-F   | TCAAGCAATACAAGATGGAGC |
| RT-erg2-R   | ACAGGGTAGGGAAGTCAAGG  |
| RT-erg25A-F | TGCAGCCAGTAGTGGTATGT  |
| RT-erg25A-R | CCACTTTGTCGTCGAACTCC  |
| RT-3250-F   | CAATCGCAGTGGAGGCATA   |
| RT-3250-R   | ATCAGTGGGAGTGGGATAGTT |
| RT-4490-F   | GACAGAGGTCCACTCAAACGA |
| RT-4490-R   | AACGACGACGGTCTATACATG |
| RT-15800-F  | AATGATTCTCCTGTCGGTGTG |
| RT-15800-R  | TTTTCAGATCGGATGGTGC   |
| RT-18270-F  | CTCGCACTTTCCGCTAACC   |

|            |                       |
|------------|-----------------------|
| RT-18270-R | CCACATCCAGATCGTCCAG   |
| RT-40000-F | CGGTTCAAGAATCGGACTATG |
| RT-40000-R | TGAGACGCAATGGGAGTGA   |
| RT-1190-F  | GATGCCACTGCCTAAGACC   |
| RT-1190-R  | CTGTGAAGGATGTAGCGGAC  |
| RT-53880-F | TCGTCTACGCCGTCCTAAC   |
| RT-53880-R | CTGCTGATTCTGCCTGTGAG  |
| RT-55060-F | TCCTGATTGCTGTTTCGC    |
| RT-55060-R | TTTCGTCCCCAGACACCAC   |
| RT-3290-F  | CAGGCAACTGTCAGCGTCA   |
| RT-3290-R  | GCACTGGGTTTCCATATTCC  |
| RT-70520-F | AATACATACCTCGCTGCCACA |
| RT-70520-R | CCTCAACGGACTCGAAAATC  |
| RT-80380-F | CATTGACCCTTCTCCTTCCC  |
| RT-80380-R | CATACTGACATCGCCATCGT  |
| RT-86150-F | CCGACTTGAATATGGGGATG  |
| RT-86150-R | CTCAGATGCGACGGTGCTT   |
| RT-89440-F | CGAGCGAATGGATGAAGAG   |
| RT-89440-R | AGCTGCTGCCAGAATGAGA   |
| RT-94860-F | TCGCCCTACTCCGACTATCC  |
| RT-94860-R | CCACATTTACGGGGTTTG    |
| RT-96380-F | GACGCCCATCAATCCTCAA   |
| RT-96380-R | CCGTTTCATATCATGCCATCC |

---
